# Supplementary material for: Mixtures of LiTFSI and urea: ideal thermodynamic behavior as key to the formation of deep eutectic solvents?
Source: Royal Society of Chemistry journal article supplement (doi:10.1039/c9cp01440c), 2019-01-01
Supplement: c9cp01440c1.pdf [file c9cp01440c1.pdf]

# Mixtures of LiTFSI and urea: ideal thermodynamic behavior as key to the formation of deep eutectic solvents?

Aniruddha Nandy<sup>†,¶</sup> and Jens Smiatek<sup>\*,‡,¶</sup>

<sup>†</sup>*Department of Mechanical Engineering, Indian Institute of Technology, Kharagpur, India*

<sup>‡</sup>*Institute for Computational Physics, University of Stuttgart, D-70569 Stuttgart, Germany*

<sup>¶</sup>*Helmholtz-Institute Münster: Ionics in Energy Storage (HIMS – IEK 12),*

*Forschungszentrum Jülich GmbH, D-48149 Münster, Germany*

E-mail: [smiatek@icp.uni-stuttgart.de](mailto:smiatek@icp.uni-stuttgart.de)

## Radial distribution function for $\text{Li}^+-\text{Li}^+$

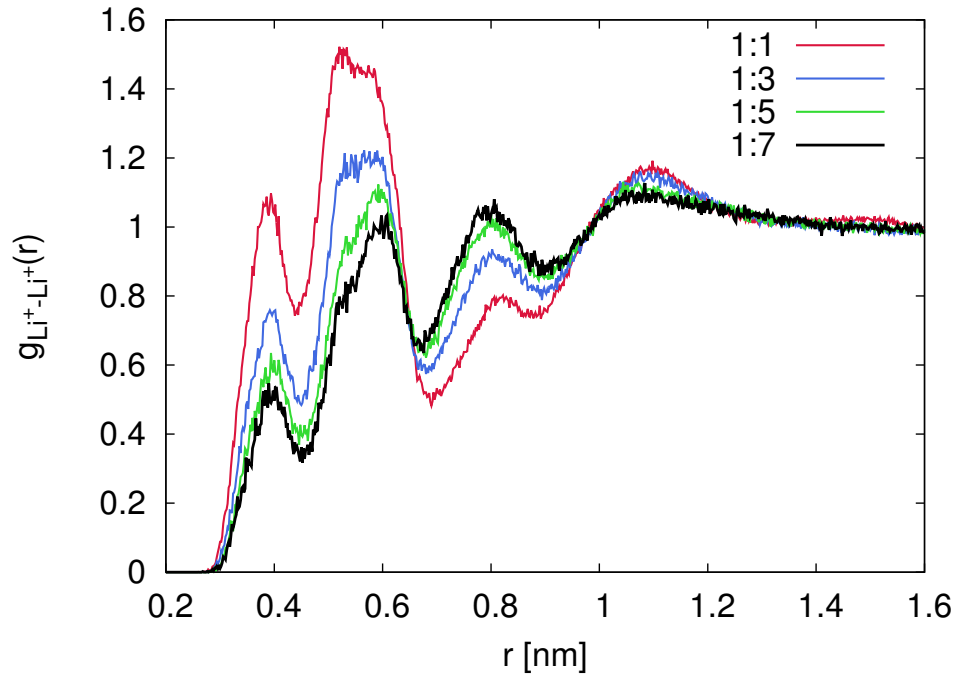

Figure 1: Radial distribution function  $g_{\text{Li}^+-\text{Li}^+}(r)$  for  $\text{Li}^+$  ions in various LiTFSI/urea mixtures as denoted in the legend.

## Molecular snapshots: DFT calculations

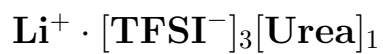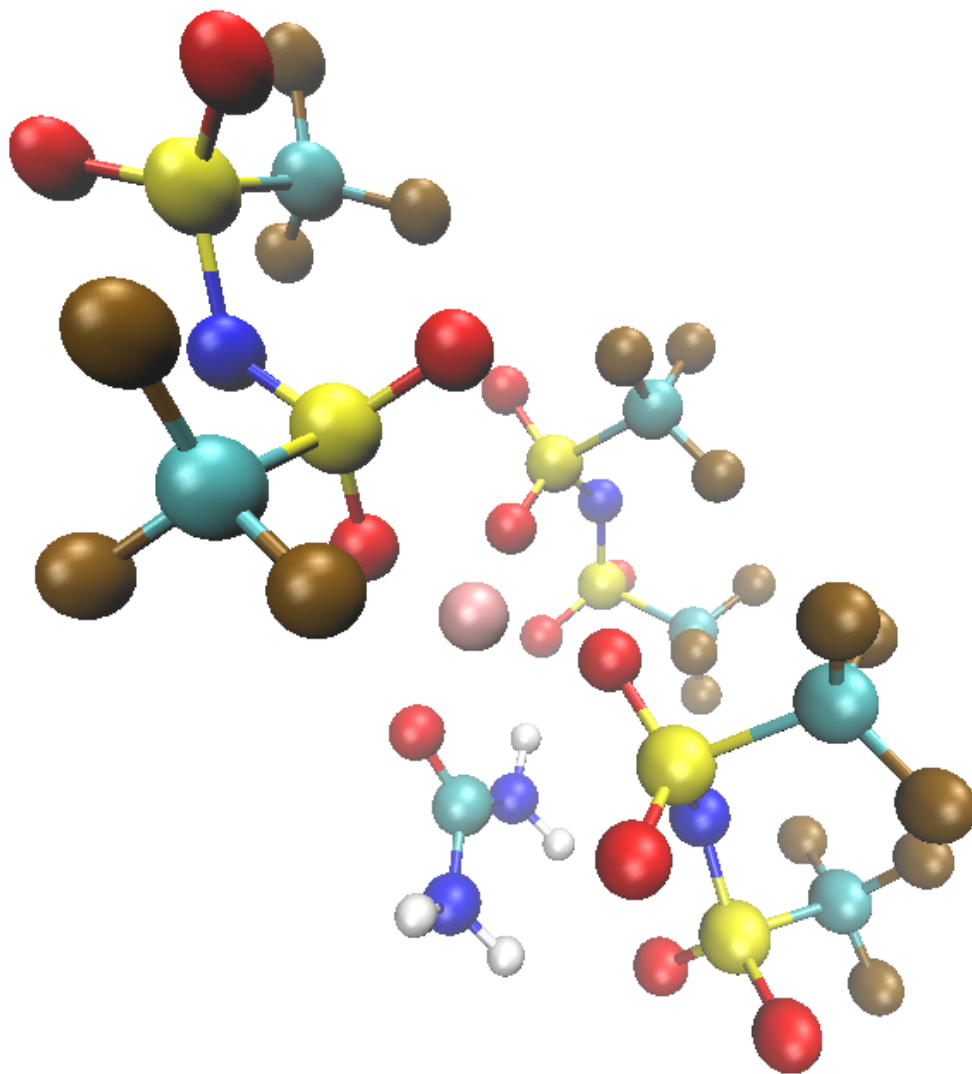

Figure 2: Molecular snapshot of a  $\text{Li}^+ \cdot [\text{TFSI}]_3[\text{Urea}]_1$  complex from DFT calculations.  $\text{Li}^+$  ions are colored in pink, sulfur atoms in yellow, oxygen atoms in red, fluorine atoms in brown, carbon atoms in turquoise and all hydrogen atoms are colored in white.

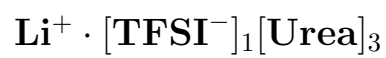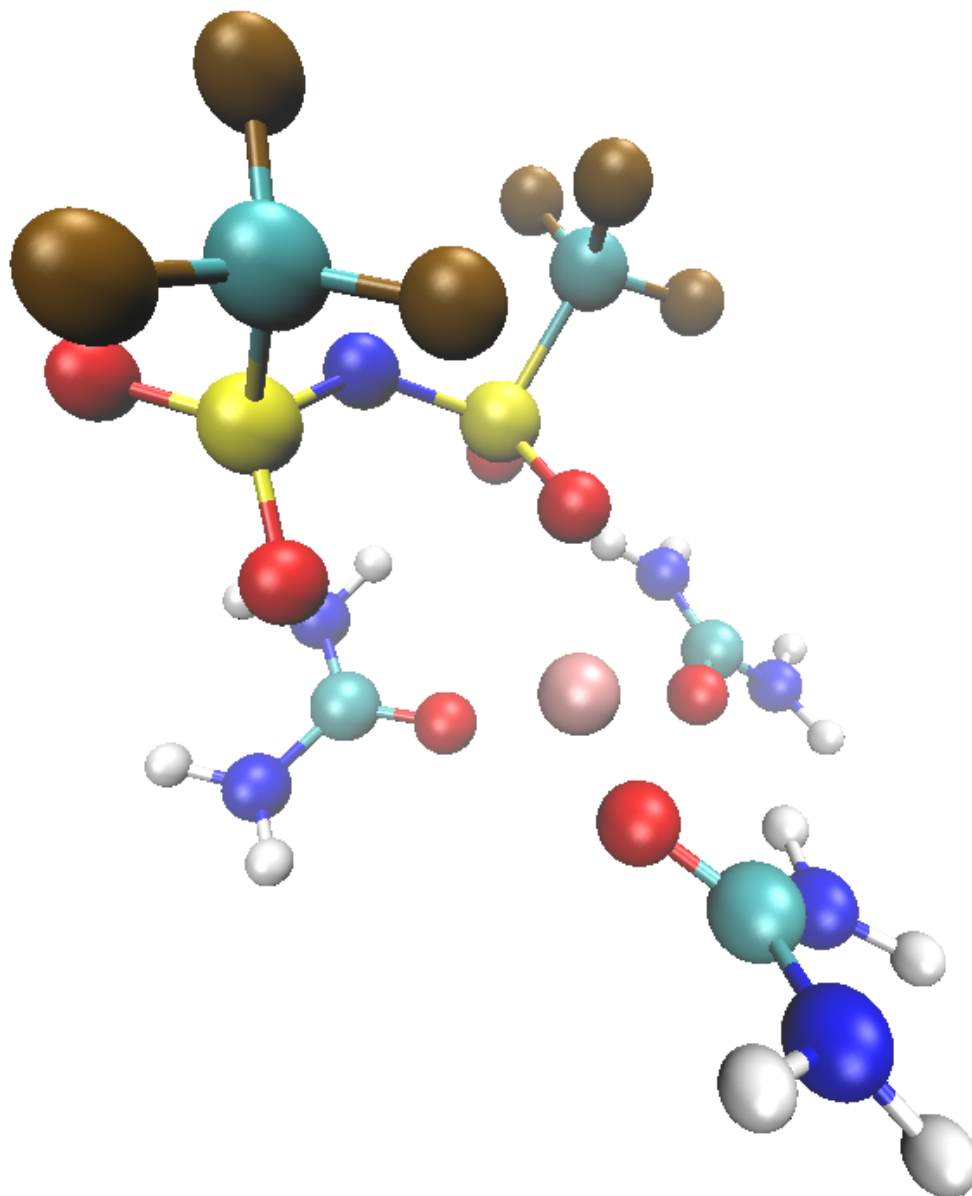

Figure 3: Molecular snapshot of a  $\text{Li}^+ \cdot [\text{TFSI}]_1[\text{Urea}]_3$  complex from DFT calculations.  $\text{Li}^+$  ions are colored in pink, sulfur atoms in yellow, oxygen atoms in red, fluorine atoms in brown, carbon atoms in turquoise and all hydrogen atoms are colored in white.

## Dielectric constants

The relative permittivity  $\epsilon_r$ , also called dielectric constant, is calculated straightforwardly by using the dipole moment fluctuation formula<sup>1-3</sup>

$$\epsilon_r = 1 + \frac{4\pi}{3} \frac{\langle \mathbf{M}_{\text{tot}}^2 \rangle}{\langle V \rangle k_B T} \quad (1)$$

with Boltzmann constant  $k_B$ , and temperature  $T$ , where  $\langle \mathbf{M}_{\text{tot}}^2 \rangle$  denotes the average squared net total molecular dipole moment in a simulation box of average volume  $\langle V \rangle$ .

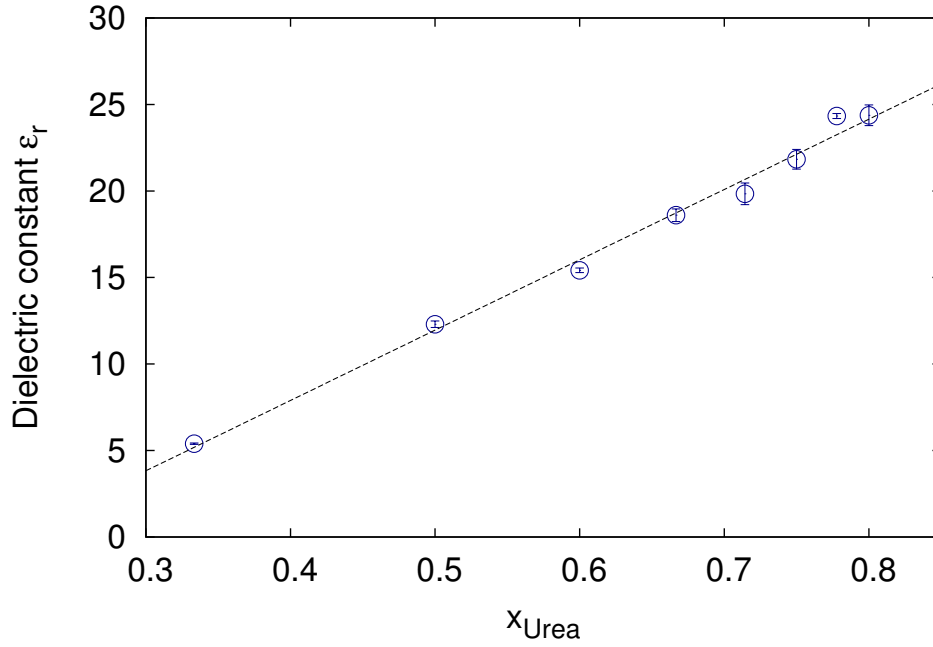

Figure 4: Dielectric constant  $\epsilon_r$  of the LiTFSI/urea mixtures for different urea mole fractions  $x_{\text{Urea}}$ . The dashed black line shows a linear fit function via regression analysis.

## Total interaction energies

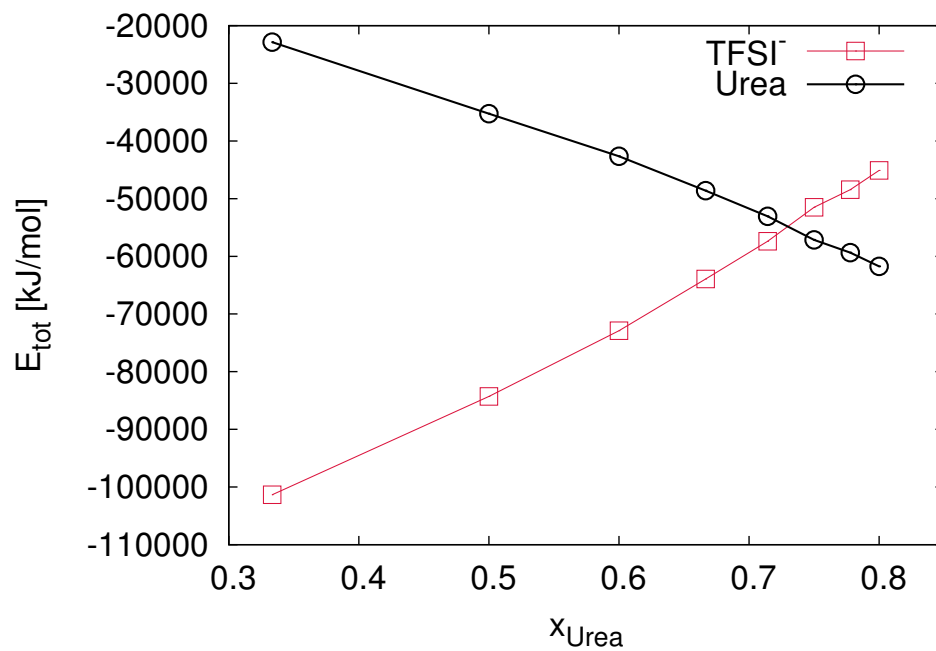

Figure 5: Total interaction energies between  $\text{Li}^+$  and urea as well as between  $\text{Li}^+$  and TFSI $^-$  ions, respectively. Values for  $\text{Li}^+$ -urea are shown as black circles whereas all values for  $\text{Li}^+$ -TFSI $^-$  are depicted as red squares.

## Mean-squared displacement (MSD) of components

With increasing urea concentration, the MSD values increase significantly. The transition from sub-diffusive ( $\sim t^\alpha$  with  $\alpha < 1$ ) to diffusive regimes ( $\sim t$ ) occurs on shorter time scales with increasing urea concentration<sup>4</sup>. With regard to this point, the first coordination shell around  $\text{Li}^+$  ions is located on length scales  $r_c = 0.544$  nm. It can be assumed that diffusive behavior is observed on time scales  $\tau > r_c^2/6D_{cm}$  and on length scales  $\Delta r^2 > \Delta r_c^2$  as marked by the horizontal black line in Fig. 6 (top).

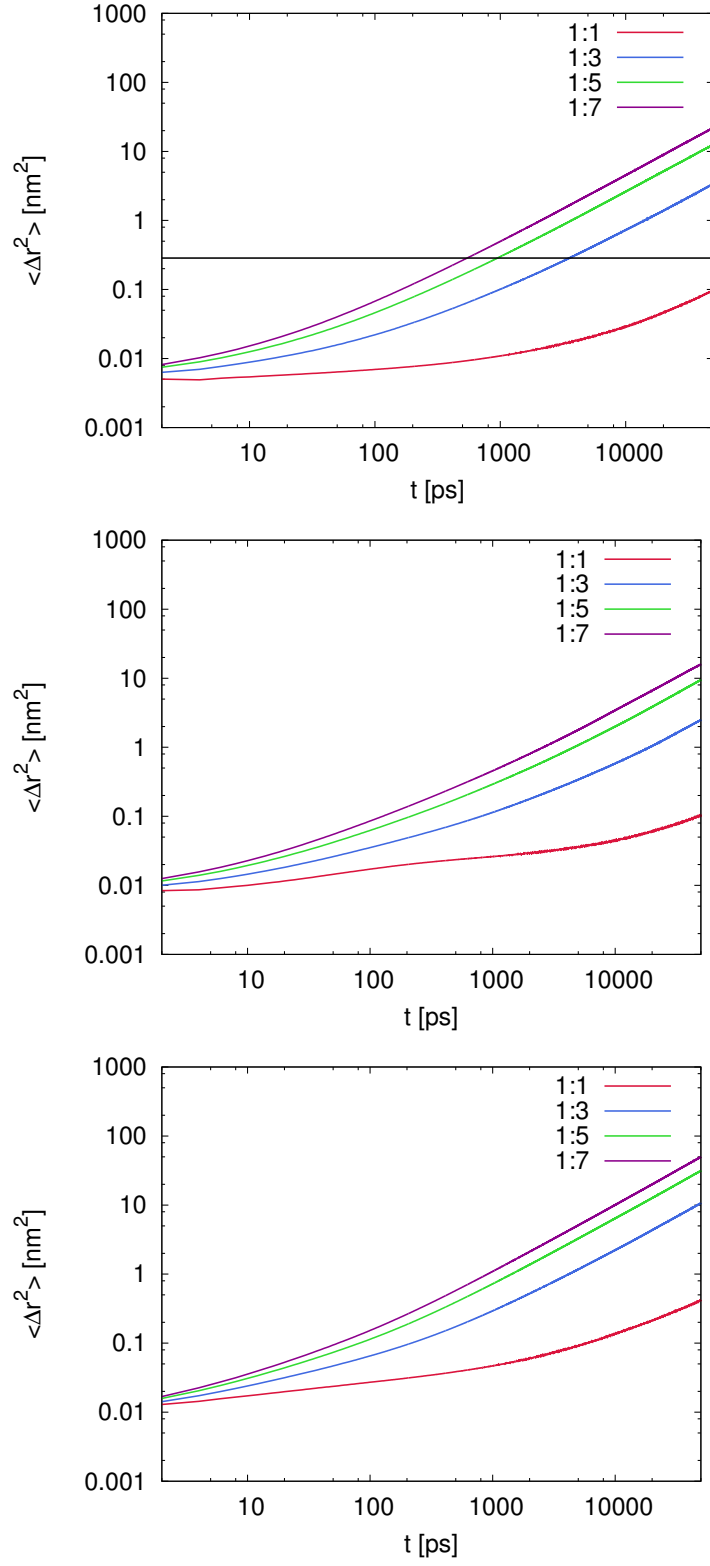

Figure 6: Mean-square displacement of  $\text{Li}^+$  (top),  $\text{TFSI}^-$  ions (middle) and urea molecules (bottom) for various mixing ratios as denoted in the legend.



## References

- (1) de Leeuw, S. W.; Perram, J. W.; Smith, E. R. Simulation of Electrostatic Systems in Periodic Boundary Conditions. I. Lattice Sums and Dielectric Constants. *Proc. Royal Soc. A* **1980**, *373*, 27–56.
- (2) Neumann, M. Dipole moment fluctuation formulas in computer simulations of polar systems. *Mol. Phys.* **1983**, *50*, 841–858.
- (3) Caillol, J.; Levesque, D.; Weis, J. Theoretical calculation of ionic solution properties. *J. Chem. Phys.* **1986**, *85*, 6645–6657.
- (4) Lesch, V.; Heuer, A.; Holm, C.; Sminatek, J. Solvent effects of 1-ethyl-3-methylimidazolium acetate: solvation and dynamic behavior of polar and apolar solutes. *Phys. Chem. Chem. Phys.* **2015**, *17*, 8480–8490.
